# Supplementary material for: Nanocrystalline triple perovskite compounds A3Fe2BO9(A = Sr, Ba; B = W, Te) with ferromagnetic and dielectric properties for triboelectric energy harvesting
Source: Royal Society of Chemistry journal article supplement (doi:10.1039/d1qm01565f), 2022-01-01
Supplement: d1qm01565f1.pdf [file d1qm01565f1.pdf]

**Electronic Supporting Information (ESI)**

**for**

**Nanocrystalline triple perovskite compounds  $A_3Fe_2BO_9$   
(A = Sr, Ba; B= W, Te) with ferromagnetic and dielectric  
properties for triboelectric energy harvesting**

Jelena Kojčinović<sup>1, ‡</sup>, Sugato Hajra<sup>2, ‡</sup>, Manisha Sahu<sup>2, ‡</sup>, Dalibor Tatar<sup>1</sup>, Teodoro Klaser<sup>3</sup>,  
Željko Skoko<sup>3</sup>, Zvonko Jagličić<sup>4,5</sup>, Elaheh Sadrollahi<sup>6,7</sup>, Fred Jochen Litterst<sup>6</sup>, Hoe Joon Kim<sup>2,\*</sup>  
and Igor Djerdj<sup>1,\*</sup>

*<sup>1</sup>Department of Chemistry, Josip Juraj Strossmayer University of Osijek, Cara Hadrijana 8/A,  
31000 Osijek, Croatia*

*<sup>2</sup>Department of Robotics Engineering, Daegu Gyeongbuk Institute of Science and Technology,  
Daegu-42988, Republic of Korea*

*<sup>3</sup>Department of Physics, Faculty of Science, University of Zagreb, Bijenička cesta 32, 10000  
Zagreb, Croatia*

*<sup>4</sup>Institute of mathematics, physics and mechanics, University of Ljubljana, Jamova 2, 1000  
Ljubljana, Slovenia*

*<sup>5</sup>Faculty of Civil & Geodetic Engineering, University of Ljubljana, Jadranska 19, 1000  
Ljubljana, Slovenia*

*<sup>6</sup>Institut für Physik der Kondensierten Materie, Technische Universität Braunschweig,  
Mendelssohnstr. 3, 38106 Braunschweig, Germany*

*<sup>7</sup>Institut für Festkörper- und Materialphysik, Technische Universität Dresden, Haeckelstr. 3,  
01069 Dresden, Germany*

**\*Corresponding authors:**

Prof. Dr. Igor Djerdj | e-mail: [igor.djerdj@kemija.unios.hr](mailto:igor.djerdj@kemija.unios.hr)

Prof. Dr. Hoe Joon Kim | e-mail: [joonkim@dgist.ac.kr](mailto:joonkim@dgist.ac.kr)

**‡Equal contribution:**

Jelena Kojčinović (J. K.), Sugato Hajra (S. H.) and Manisha Sahu (M. S.)

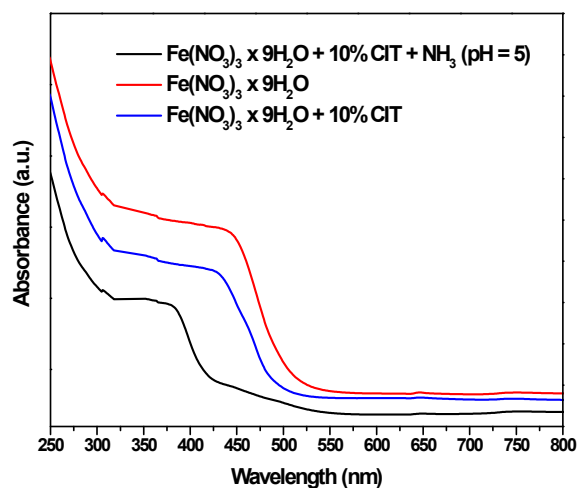

**Figure S1.** UV/Vis absorption spectra of aqueous solution of iron(III) nitrate nonahydrate ( $c = 8.1 \cdot 10^{-3} \text{ mol dm}^{-3}$ ) without addition of citric acid (red), with addition of citric acid,  $w = 10 \%$  (blue), with addition of both citric acid ( $c = 10\%$ ) and concentrated ammonia solution (pH = 5) (black).

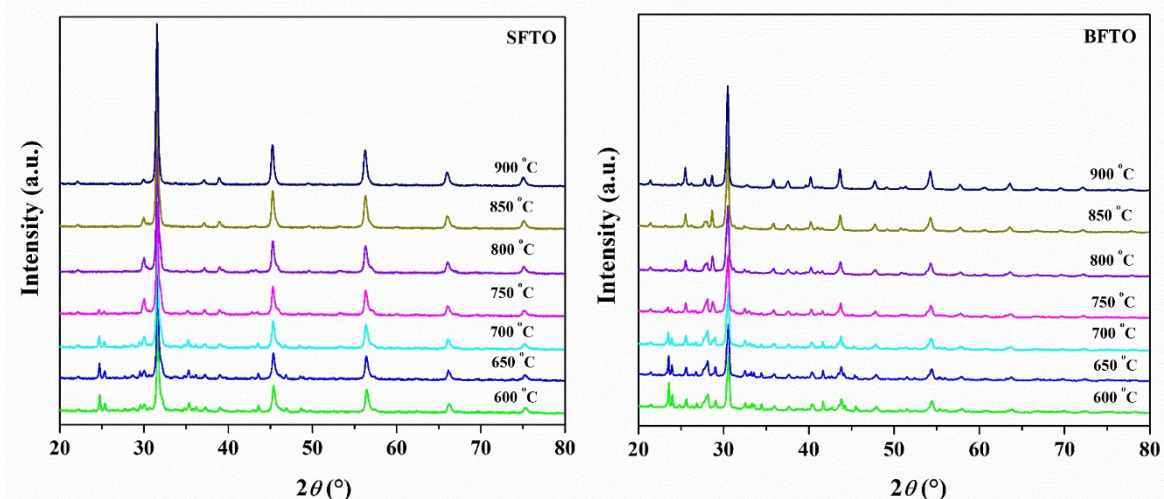

**Figure S2.** Temperature-dependent powder XRD patterns of SFTO (left) and BFTO (right) taken from 600 to 900 °C.

**Table S1.** Crystallographic data and refinement parameters obtained from the temperature-dependent X-ray powder diffraction for the SFTO (after the first step of calcination at 600 °C) collected 600 °C.

| Chemical formula                                                   | SrO                                    | SrCO <sub>3</sub>                                           | Fe <sub>3</sub> O <sub>4</sub> | Sr <sub>3</sub> Fe <sub>2</sub> TeO    |
|--------------------------------------------------------------------|----------------------------------------|-------------------------------------------------------------|--------------------------------|----------------------------------------|
| Space group                                                        | <i>I4/mmm</i><br>(139)                 | <i>Pnma</i> (62)                                            | <i>Fd-3m</i><br>(227)          | <i>I4/m</i> (87)                       |
| Molecular weight                                                   | 103.62                                 | 147.63                                                      | 231.54                         | 646.15                                 |
| Crystal system                                                     | tetragonal                             | orthorhombic                                                | cubic                          | tetragonal                             |
| Lattice parameters (Å)                                             | <i>a</i> = 3.3984<br><i>c</i> = 6.5149 | <i>a</i> = 6.1913<br><i>b</i> = 5.1402<br><i>c</i> = 8.4786 | <i>a</i> = 8.3944              | <i>a</i> = 5.6288<br><i>c</i> = 7.9612 |
| Cell volume (Å <sup>3</sup> )                                      | 75.24                                  | 269.83                                                      | 591.52                         | 252.24                                 |
| Calculated density (g/cm <sup>3</sup> )                            | 5.280                                  | 3.634                                                       | 5.200                          | 5.650                                  |
| Data collection range                                              |                                        | 20 to 80 °                                                  |                                |                                        |
| No. of parameters refined                                          |                                        | 40                                                          |                                |                                        |
| Average apparent crystallite size (nm)                             | 44.1                                   | 61.7                                                        | 28.7                           | 26.9                                   |
| Average apparent microstrain (×10 <sup>-4</sup> )                  | 4.23                                   | 4.23                                                        | 4.23                           | 4.23                                   |
| Phase composition (wt %)                                           | 2.86                                   | 15.99                                                       | 13.48                          | 67.67                                  |
| R <sub>B</sub> (%)                                                 | 18.0                                   | 15.7                                                        | 14.5                           | 2.88                                   |
| Conventional R <sub>p</sub> , R <sub>wp</sub> , R <sub>c</sub> (%) |                                        | 23.0, 15.2, 9.10                                            |                                |                                        |
| GoF                                                                |                                        | 1.6                                                         |                                |                                        |

**Table S2.** Crystallographic data and refinement parameters obtained from the temperature-dependent X-ray powder diffraction for the SFTO (after the first step of calcination at 600 °C) collected at 650 °C.

| Chemical formula                                                   | SrO                                    | SrCO <sub>3</sub>                                           | Fe <sub>3</sub> O <sub>4</sub> | Sr <sub>3</sub> Fe <sub>2</sub> TeO    |
|--------------------------------------------------------------------|----------------------------------------|-------------------------------------------------------------|--------------------------------|----------------------------------------|
| Space group                                                        | <i>I4/mmm</i><br>(139)                 | <i>Pnma</i> (62)                                            | <i>Fd-3m</i><br>(227)          | <i>I4/m</i> (87)                       |
| Molecular weight                                                   | 103.62                                 | 147.63                                                      | 231.54                         | 646.15                                 |
| Crystal system                                                     | tetragonal                             | orthorhombic                                                | cubic                          | tetragonal                             |
| Lattice parameters (Å)                                             | <i>a</i> = 3.4037<br><i>c</i> = 6.5156 | <i>a</i> = 6.2100<br><i>b</i> = 5.1439<br><i>c</i> = 8.4863 | <i>a</i> = 8.4022              | <i>a</i> = 5.6912<br><i>c</i> = 8.0187 |
| Cell volume (Å <sup>3</sup> )                                      | 75.49                                  | 271.08                                                      | 593.16                         | 259.72                                 |
| Calculated density (g/cm <sup>3</sup> )                            | 5.263                                  | 3.617                                                       | 5.185                          | 5.637                                  |
| Data collection range                                              |                                        | 20 to 80 °                                                  |                                |                                        |
| No. of parameters refined                                          |                                        | 40                                                          |                                |                                        |
| Average apparent crystallite size (nm)                             | 58.3                                   | 62.2                                                        | 25.7                           | 23.6                                   |
| Average apparent microstrain (×10 <sup>-4</sup> )                  | 4.23                                   | 4.23                                                        | 4.23                           | 4.23                                   |
| Phase composition (wt %)                                           | 2.55                                   | 14.24                                                       | 13.97                          | 69.24                                  |
| R <sub>B</sub> (%)                                                 | 18.6                                   | 16.9                                                        | 17.3                           | 3.02                                   |
| Conventional R <sub>p</sub> , R <sub>wp</sub> , R <sub>c</sub> (%) |                                        | 23.4, 15.0, 8.91                                            |                                |                                        |
| GoF                                                                |                                        | 1.7                                                         |                                |                                        |

**Table S3.** Crystallographic data and refinement parameters obtained from the temperature-dependent X-ray powder diffraction for the SFTO (after the first step of calcination at 600 °C) collected at 700 °C.

| Chemical formula                                                   | SrO                                    | SrCO <sub>3</sub>                                           | Fe <sub>3</sub> O <sub>4</sub> | Sr <sub>3</sub> Fe <sub>2</sub> TeO    |
|--------------------------------------------------------------------|----------------------------------------|-------------------------------------------------------------|--------------------------------|----------------------------------------|
| Space group                                                        | <i>I4/mmm</i><br>(139)                 | <i>Pnma</i> (62)                                            | <i>Fd-3m</i><br>(227)          | <i>I4/m</i> (87)                       |
| Molecular weight                                                   | 103.62                                 | 147.63                                                      | 231.54                         | 646.15                                 |
| Crystal system                                                     | tetragonal                             | orthorhombic                                                | cubic                          | tetragonal                             |
| Lattice parameters (Å)                                             | <i>a</i> = 3.4051<br><i>c</i> = 6.5241 | <i>a</i> = 6.2292<br><i>b</i> = 5.1449<br><i>c</i> = 8.4919 | <i>a</i> = 8.3963              | <i>a</i> = 5.7502<br><i>c</i> = 8.0764 |
| Cell volume (Å <sup>3</sup> )                                      | 75.65                                  | 272.16                                                      | 591.93                         | 267.04                                 |
| Calculated density (g/cm <sup>3</sup> )                            | 5.252                                  | 3.603                                                       | 5.196                          | 5.628                                  |
| Data collection range                                              |                                        | 20 to 80 °                                                  |                                |                                        |
| No. of parameters refined                                          |                                        | 40                                                          |                                |                                        |
| Average apparent crystallite size (nm)                             | 64.8                                   | 65.5                                                        | 21.6                           | 22.7                                   |
| Average apparent microstrain (×10 <sup>-4</sup> )                  | 4.23                                   | 4.23                                                        | 4.23                           | 4.23                                   |
| Phase composition (wt %)                                           | 1.96                                   | 10.89                                                       | 15.66                          | 71.48                                  |
| R <sub>B</sub> (%)                                                 | 17.5                                   | 20.3                                                        | 20.4                           | 2.97                                   |
| Conventional R <sub>p</sub> , R <sub>wp</sub> , R <sub>c</sub> (%) |                                        | 25.3, 15.8, 8.74                                            |                                |                                        |
| GoF                                                                |                                        | 1.8                                                         |                                |                                        |

**Table S4.** Crystallographic data and refinement parameters obtained from the temperature-dependent X-ray powder diffraction for the SFTO (after the first step of calcination at 600 °C) collected at 750 °C.

| Chemical formula                                                   | SrCO <sub>3</sub>                                           | Fe <sub>3</sub> O <sub>4</sub> | Sr <sub>3</sub> Fe <sub>2</sub> TeO <sub>9</sub> |
|--------------------------------------------------------------------|-------------------------------------------------------------|--------------------------------|--------------------------------------------------|
| Space group                                                        | <i>Pnma</i> (62)                                            | <i>Fd-3m</i> (227)             | <i>I4/m</i> (87)                                 |
| Molecular weight                                                   | 147.63                                                      | 231.54                         | 646.15                                           |
| Crystal system                                                     | orthorhombic                                                | cubic                          | tetragonal                                       |
| Lattice parameters (Å)                                             | <i>a</i> = 6.2391<br><i>b</i> = 5.1487<br><i>c</i> = 8.4965 | <i>a</i> = 8.3954              | <i>a</i> = 5.8064<br><i>c</i> = 8.1341           |
| Cell volume (Å <sup>3</sup> )                                      | 272.94                                                      | 591.73                         | 274.24                                           |
| Calculated density (g/cm <sup>3</sup> )                            | 3.593                                                       | 5.198                          | 5.624                                            |
| Data collection range                                              |                                                             | 20 to 80 °                     |                                                  |
| No. of parameters refined                                          |                                                             | 33                             |                                                  |
| Average apparent crystallite size (nm)                             | 88.2                                                        | 19.1                           | 21.7                                             |
| Average apparent microstrain (×10 <sup>-4</sup> )                  | 4.23                                                        | 4.23                           | 4.23                                             |
| Phase composition (wt %)                                           | 3.84                                                        | 15.01                          | 81.15                                            |
| R <sub>B</sub> (%)                                                 | 29.7                                                        | 31.7                           | 2.97                                             |
| Conventional R <sub>p</sub> , R <sub>wp</sub> , R <sub>e</sub> (%) |                                                             | 28.2, 17.5, 8.39               |                                                  |
| GoF                                                                |                                                             | 2.1                            |                                                  |

**Table S5.** Crystallographic data and refinement parameters obtained from the temperature-dependent X-ray powder diffraction for the SFTO (after the first step of calcination at 600 °C) collected at 800 °C.

| <b>Chemical formula</b>                                            | <b>Fe<sub>3</sub>O<sub>4</sub></b> | <b>Sr<sub>3</sub>Fe<sub>2</sub>TeO</b> |
|--------------------------------------------------------------------|------------------------------------|----------------------------------------|
| Space group                                                        | <i>Fd-3m</i><br>(227)              | <i>I4/m</i> (87)                       |
| Molecular weight                                                   | 231.54                             | 646.15                                 |
| Crystal system                                                     | cubic                              | tetragonal                             |
| Lattice parameters (Å)                                             | $a = 8.3922$                       | $a = 5.8462$<br>$c = 8.1819$           |
| Cell volume (Å <sup>3</sup> )                                      | 591.06                             | 279.64                                 |
| Calculated density (g/cm <sup>3</sup> )                            | 5.204                              | 5.623                                  |
| Data collection range                                              | 20 to 80 °                         |                                        |
| No. of parameters refined                                          | 18                                 |                                        |
| Average apparent crystallite size (nm)                             | 18.4                               | 22.7                                   |
| Average apparent microstrain ( $\times 10^{-4}$ )                  | 4.23                               | 4.23                                   |
| Phase composition (wt %)                                           | 13.26                              | 86.74                                  |
| R <sub>B</sub> (%)                                                 | 31.0                               | 3.51                                   |
| Conventional R <sub>p</sub> , R <sub>wp</sub> , R <sub>e</sub> (%) | 24.6, 15.7, 7.95                   |                                        |
| GoF                                                                | 1.9                                |                                        |

**Table S6.** Crystallographic data and refinement parameters obtained from the temperature-dependent X-ray powder diffraction for the SFTO (after the first step of calcination at 600 °C) collected at 850 °C.

| <b>Chemical formula</b>                                            | <b>Fe<sub>3</sub>O<sub>4</sub></b> | <b>Sr<sub>3</sub>Fe<sub>2</sub>TeO</b> |
|--------------------------------------------------------------------|------------------------------------|----------------------------------------|
| Space group                                                        | <i>Fd-3m</i>                       | <i>I4/m</i> (87)                       |
| Molecular weight                                                   | 231.54                             | 646.15                                 |
| Crystal system                                                     | cubic                              | tetragonal                             |
| Lattice parameters (Å)                                             | <i>a</i> = 8.4026                  | <i>a</i> = 5.9036<br><i>c</i> = 8.2393 |
| Cell volume (Å <sup>3</sup> )                                      | 593.24                             | 287.16                                 |
| Calculated density (g/cm <sup>3</sup> )                            | 5.185                              | 5.612                                  |
| Data collection range                                              | 20 to 80 °                         |                                        |
| No. of parameters refined                                          | 18                                 |                                        |
| Average apparent crystallite size                                  | 19.2                               | 26.2                                   |
| Average apparent microstrain (×10 <sup>-4</sup> )                  | 4.23                               | 4.23                                   |
| Phase composition (wt %)                                           | 9.45                               | 90.55                                  |
| R <sub>B</sub> (%)                                                 | 36.0                               | 2.68                                   |
| Conventional R <sub>p</sub> , R <sub>wp</sub> , R <sub>c</sub> (%) | 20.6, 12.7, 7.47                   |                                        |
| GoF                                                                | 1.7                                |                                        |



**Table S7.** Crystallographic data and refinement parameters obtained from the temperature-dependent X-ray powder diffraction for the SFTO (after the first step of calcination at 600 °C) collected at 900 °C.

| <b>Chemical formula</b>                                            | <b>Fe<sub>3</sub>O<sub>4</sub></b> | <b>Sr<sub>3</sub>Fe<sub>2</sub>TeO</b> |
|--------------------------------------------------------------------|------------------------------------|----------------------------------------|
| Space group                                                        | <i>Fd-3m</i>                       | <i>I4/m</i> (87)                       |
| Molecular weight                                                   | 231.54                             | 646.15                                 |
| Crystal system                                                     | cubic                              | tetragonal                             |
| Lattice parameters (Å)                                             | $a = 8.4068$                       | $a = 5.9612$<br>$c = 8.2968$           |
| Cell volume (Å <sup>3</sup> )                                      | 594.15                             | 294.83                                 |
| Calculated density (g/cm <sup>3</sup> )                            | 5.177                              | 5.599                                  |
| Data collection range                                              | 20 to 80 °                         |                                        |
| No. of parameters refined                                          | 18                                 |                                        |
| Average apparent crystallite size                                  | 21.1                               | 29.0                                   |
| Average apparent microstrain ( $\times 10^{-4}$ )                  | 4.23                               | 4.23                                   |
| Phase composition (wt %)                                           | 5.46                               | 94.54                                  |
| R <sub>B</sub> (%)                                                 | 44.9                               | 3.53                                   |
| Conventional R <sub>p</sub> , R <sub>wp</sub> , R <sub>e</sub> (%) | 21.3, 13.3, 7.27                   |                                        |
| GoF                                                                | 1.8                                |                                        |

**Table S8.** Crystallographic data and refinement parameters obtained from the temperature-dependent X-ray powder diffraction for the BFTO (after the first step of calcination at 600 °C) collected 600 °C.

| <b>Chemical formula</b>                                            | <b>Ba<sub>3</sub>Fe<sub>2</sub>TeO<sub>9</sub></b> | <b>BaCO<sub>3</sub></b>                                     | <b>BaFe<sub>2</sub>O<sub>4</sub></b>                         | <b>Ba<sub>3</sub>TeO<sub>6</sub></b>     |
|--------------------------------------------------------------------|----------------------------------------------------|-------------------------------------------------------------|--------------------------------------------------------------|------------------------------------------|
| Space group                                                        | <i>P6<sub>3</sub>/mmc</i> (194)                    | <i>Pnma</i> (62)                                            | <i>Bb2<sub>1</sub>m</i> (36)                                 | <i>I4<sub>1</sub>/a</i> (88)             |
| Molecular weight                                                   | 795.27                                             | 197.34                                                      | 313.02                                                       | 635.58                                   |
| Crystal system                                                     | hexagonal                                          | orthorhombic                                                | orthorhombic                                                 | tetragonal                               |
| Lattice parameters (Å)                                             | <i>a</i> = 5.8267<br><i>c</i> = 14.3257            | <i>a</i> = 6.6262<br><i>b</i> = 5.3319<br><i>c</i> = 8.9245 | <i>a</i> = 19.1837<br><i>b</i> = 5.3700<br><i>c</i> = 8.6215 | <i>a</i> = 19.3949<br><i>c</i> = 34.6262 |
| Cell volume (Å <sup>3</sup> )                                      | 421.20                                             | 315.30                                                      | 888.16                                                       | 13025.11                                 |
| Calculated density (g/cm <sup>3</sup> )                            | 12.542                                             | 4.157                                                       | 4.682                                                        | 6.483                                    |
| Data collection range                                              | 20 to 80 °                                         |                                                             |                                                              |                                          |
| No. of parameters refined                                          | 71                                                 |                                                             |                                                              |                                          |
| Average apparent crystallite size (nm)                             | 26.2                                               | 90.3                                                        | 16.8                                                         | 60.4                                     |
| Average apparent microstrain (×10 <sup>-4</sup> )                  | 4.23                                               | 4.23                                                        | 4.23                                                         | 4.23                                     |
| Phase composition (wt %)                                           | 33.40                                              | 18.84                                                       | 44.35                                                        | 3.41                                     |
| R <sub>B</sub> (%)                                                 | 5.84                                               | 15.0                                                        | 10.6                                                         | 14.5                                     |
| Conventional R <sub>p</sub> , R <sub>wp</sub> , R <sub>c</sub> (%) | 21.1, 20.3, 9.09                                   |                                                             |                                                              |                                          |
| GoF                                                                | 2.2                                                |                                                             |                                                              |                                          |

**Table S9.** Crystallographic data and refinement parameters obtained from the temperature-dependent X-ray powder diffraction for the BFTO (after the first step of calcination at 600 °C) collected at 650 °C.

| <b>Chemical formula</b>                                            | <b>Ba<sub>3</sub>Fe<sub>2</sub>TeO<sub>9</sub></b> | <b>BaCO<sub>3</sub></b>                                     | <b>BaFe<sub>2</sub>O<sub>4</sub></b>                         | <b>Ba<sub>3</sub>TeO<sub>6</sub></b>     |
|--------------------------------------------------------------------|----------------------------------------------------|-------------------------------------------------------------|--------------------------------------------------------------|------------------------------------------|
| Space group                                                        | <i>P6<sub>3</sub>/mmc</i> (194)                    | <i>Pnma</i> (62)                                            | <i>Bb2<sub>1</sub>m</i> (36)                                 | <i>I4<sub>1</sub>/a</i> (88)             |
| Molecular weight                                                   | 795.27                                             | 197.34                                                      | 313.02                                                       | 635.58                                   |
| Crystal system                                                     | hexagonal                                          | orthorhombic                                                | orthorhombic                                                 | tetragonal                               |
| Lattice parameters (Å)                                             | <i>a</i> = 5.8267<br><i>c</i> = 14.3257            | <i>a</i> = 6.6262<br><i>b</i> = 5.3319<br><i>c</i> = 8.9245 | <i>a</i> = 19.1838<br><i>b</i> = 5.3699<br><i>c</i> = 8.6217 | <i>a</i> = 19.3950<br><i>c</i> = 34.6262 |
| Cell volume (Å <sup>3</sup> )                                      | 421.20                                             | 315.30                                                      | 888.17                                                       | 13025.16                                 |
| Calculated density (g/cm <sup>3</sup> )                            | 12.542                                             | 4.157                                                       | 4.682                                                        | 6.483                                    |
| Data collection range                                              |                                                    |                                                             | 20 to 80 °                                                   |                                          |
| No. of parameters refined                                          |                                                    |                                                             | 71                                                           |                                          |
| Average apparent crystallite size (nm)                             | 24.8                                               | 101.2                                                       | 17.2                                                         | 57.5                                     |
| Average apparent microstrain (×10 <sup>-4</sup> )                  | 4.23                                               | 4.23                                                        | 4.23                                                         | 4.23                                     |
| Phase composition (wt %)                                           | 33.79                                              | 14.11                                                       | 48.23                                                        | 3.87                                     |
| R <sub>B</sub> (%)                                                 | 5.87                                               | 16.1                                                        | 11.1                                                         | 16.4                                     |
| Conventional R <sub>p</sub> , R <sub>wp</sub> , R <sub>e</sub> (%) |                                                    |                                                             | 22.5, 21.2, 9.20                                             |                                          |
| GoF                                                                |                                                    |                                                             | 2.3                                                          |                                          |

**Table S10.** Crystallographic data and refinement parameters obtained from the temperature-dependent X-ray powder diffraction for the BFTO (after the first step of calcination at 600 °C) collected at 700 °C.

| Chemical formula                                                   | Ba <sub>3</sub> Fe <sub>2</sub> TeO <sub>9</sub> | BaCO <sub>3</sub>                                           | BaFe <sub>2</sub> O <sub>4</sub>                             | Ba <sub>3</sub> TeO <sub>6</sub>         |
|--------------------------------------------------------------------|--------------------------------------------------|-------------------------------------------------------------|--------------------------------------------------------------|------------------------------------------|
| Space group                                                        | <i>P6<sub>3</sub>/mmc</i> (194)                  | <i>Pnma</i> (62)                                            | <i>Bb2<sub>1</sub>m</i> (36)                                 | <i>I4<sub>1</sub>/a</i> (88)             |
| Molecular weight                                                   | 795.27                                           | 197.34                                                      | 313.02                                                       | 635.58                                   |
| Crystal system                                                     | hexagonal                                        | orthorhombic                                                | orthorhombic                                                 | tetragonal                               |
| Lattice parameters (Å)                                             | <i>a</i> = 5.8304<br><i>c</i> = 14.3305          | <i>a</i> = 6.6489<br><i>b</i> = 5.3331<br><i>c</i> = 8.9275 | <i>a</i> = 19.1929<br><i>b</i> = 5.3806<br><i>c</i> = 8.6208 | <i>a</i> = 19.4347<br><i>c</i> = 34.6590 |
| Cell volume (Å <sup>3</sup> )                                      | 421.88                                           | 316.56                                                      | 890.26                                                       | 13091.00                                 |
| Calculated density (g/cm <sup>3</sup> )                            | 12.522                                           | 4.141                                                       | 4.671                                                        | 6.450                                    |
| Data collection range                                              |                                                  | 20 to 80 °                                                  |                                                              |                                          |
| No. of parameters refined                                          |                                                  | 71                                                          |                                                              |                                          |
| Average apparent crystallite size (nm)                             | 22.6                                             | 85.6                                                        | 20.2                                                         | 33.4                                     |
| Average apparent microstrain (×10 <sup>-4</sup> )                  | 4.23                                             | 4.23                                                        | 4.23                                                         | 4.23                                     |
| Phase composition (wt %)                                           | 38.93                                            | 10.28                                                       | 44.26                                                        | 6.53                                     |
| R <sub>B</sub> (%)                                                 | 5.59                                             | 18.6                                                        | 12.1                                                         | 14.7                                     |
| Conventional R <sub>p</sub> , R <sub>wp</sub> , R <sub>c</sub> (%) |                                                  | 22.9, 21.7, 9.23                                            |                                                              |                                          |
| GoF                                                                |                                                  | 2.3                                                         |                                                              |                                          |

**Table S11.** Crystallographic data and refinement parameters obtained from the temperature-dependent X-ray powder diffraction for the BFTO (after the first step of calcination at 600 °C) collected at 750 °C.

| Chemical formula                                                   | Ba <sub>3</sub> Fe <sub>2</sub> TeO <sub>9</sub> | BaCO <sub>3</sub>                                           | BaFe <sub>2</sub> O <sub>4</sub>                             | Ba <sub>3</sub> TeO <sub>6</sub>         |
|--------------------------------------------------------------------|--------------------------------------------------|-------------------------------------------------------------|--------------------------------------------------------------|------------------------------------------|
| Space group                                                        | <i>P6<sub>3</sub>/mmc</i> (194)                  | <i>Pnma</i> (62)                                            | <i>Bb2<sub>1</sub>m</i> (36)                                 | <i>I4<sub>1</sub>/a</i> (88)             |
| Molecular weight                                                   | 795.27                                           | 197.34                                                      | 313.02                                                       | 635.58                                   |
| Crystal system                                                     | hexagonal                                        | orthorhombic                                                | orthorhombic                                                 | tetragonal                               |
| Lattice parameters (Å)                                             | <i>a</i> = 5.8363<br><i>c</i> = 14.3439          | <i>a</i> = 6.6760<br><i>b</i> = 5.3390<br><i>c</i> = 8.9336 | <i>a</i> = 19.1942<br><i>b</i> = 5.4015<br><i>c</i> = 8.6121 | <i>a</i> = 19.6117<br><i>c</i> = 34.6257 |
| Cell volume (Å <sup>3</sup> )                                      | 423.13                                           | 318.42                                                      | 892.89                                                       | 13317.63                                 |
| Calculated density (g/cm <sup>3</sup> )                            | 12.485                                           | 4.117                                                       | 4.657                                                        | 6.340                                    |
| Data collection range                                              | 20 to 80 °                                       |                                                             |                                                              |                                          |
| No. of parameters refined                                          | 71                                               |                                                             |                                                              |                                          |
| Average apparent crystallite size (nm)                             | 20.1                                             | 65.0                                                        | 25.6                                                         | 29.7                                     |
| Average apparent microstrain (×10 <sup>-4</sup> )                  | 4.23                                             | 4.23                                                        | 4.23                                                         | 4.23                                     |
| Phase composition (wt %)                                           | 49.95                                            | 5.32                                                        | 34.96                                                        | 9.77                                     |
| R <sub>B</sub> (%)                                                 | 5.91                                             | 23.1                                                        | 12.5                                                         | 14.7                                     |
| Conventional R <sub>p</sub> , R <sub>wp</sub> , R <sub>c</sub> (%) | 22.2, 20.7, 9.21                                 |                                                             |                                                              |                                          |
| GoF                                                                | 2.2                                              |                                                             |                                                              |                                          |

**Table S12.** Crystallographic data and refinement parameters obtained from the temperature-dependent X-ray powder diffraction for the BFTO (after the first step of calcination at 600 °C) collected at 800 °C.

| Chemical formula                                                   | Ba <sub>3</sub> Fe <sub>2</sub> TeO <sub>9</sub> | BaCO <sub>3</sub>                                           | BaFe <sub>2</sub> O <sub>4</sub>                             | Ba <sub>3</sub> TeO <sub>6</sub>         |
|--------------------------------------------------------------------|--------------------------------------------------|-------------------------------------------------------------|--------------------------------------------------------------|------------------------------------------|
| Space group                                                        | <i>P6<sub>3</sub>/mmc</i> (194)                  | <i>Pnma</i> (62)                                            | <i>Bb2<sub>1</sub>m</i> (36)                                 | <i>I4<sub>1</sub>/a</i> (88)             |
| Molecular weight                                                   | 795.27                                           | 197.34                                                      | 313.02                                                       | 635.58                                   |
| Crystal system                                                     | hexagonal                                        | orthorhombic                                                | orthorhombic                                                 | tetragonal                               |
| Lattice parameters (Å)                                             | <i>a</i> = 5.8440<br><i>c</i> = 14.3705          | <i>a</i> = 6.8221<br><i>b</i> = 5.3747<br><i>c</i> = 8.7994 | <i>a</i> = 19.2088<br><i>b</i> = 5.4216<br><i>c</i> = 8.6328 | <i>a</i> = 19.6847<br><i>c</i> = 35.0259 |
| Cell volume (Å <sup>3</sup> )                                      | 425.03                                           | 322.64                                                      | 899.04                                                       | 13572.02                                 |
| Calculated density (g/cm <sup>3</sup> )                            | 12.429                                           | 4.063                                                       | 4.626                                                        | 6.222                                    |
| Data collection range                                              |                                                  | 20 to 80 °                                                  |                                                              |                                          |
| No. of parameters refined                                          |                                                  | 70                                                          |                                                              |                                          |
| Average apparent crystallite size (nm)                             | 19.7                                             | 18.6                                                        | 19.3                                                         | 38.9                                     |
| Average apparent microstrain (×10 <sup>-4</sup> )                  | 4.23                                             | 4.23                                                        | 4.23                                                         | 4.23                                     |
| Phase composition (wt %)                                           | 58.80                                            | 3.42                                                        | 27.08                                                        | 10.70                                    |
| R <sub>B</sub> (%)                                                 | 5.14                                             | 21.7                                                        | 15.0                                                         | 14.7                                     |
| Conventional R <sub>p</sub> , R <sub>wp</sub> , R <sub>e</sub> (%) |                                                  | 19.6, 18.5, 8.65                                            |                                                              |                                          |
| GoF                                                                |                                                  | 2.1                                                         |                                                              |                                          |

**Table S13.** Crystallographic data and refinement parameters obtained from the temperature-dependent X-ray powder diffraction for the BFTO (after the first step of calcination at 600 °C) collected at 850 °C.

| Chemical formula                                                   | Ba <sub>3</sub> Fe <sub>2</sub> TeO <sub>9</sub> | BaFe <sub>2</sub> O <sub>4</sub>                             | Ba <sub>3</sub> TeO <sub>6</sub>         |
|--------------------------------------------------------------------|--------------------------------------------------|--------------------------------------------------------------|------------------------------------------|
| Space group                                                        | <i>P6<sub>3</sub>/mmc</i> (194)                  | <i>Bb2<sub>1</sub>m</i> (36)                                 | <i>I4<sub>1</sub>/a</i> (88)             |
| Molecular weight                                                   | 795.27                                           | 313.02                                                       | 635.58                                   |
| Crystal system                                                     | hexagonal                                        | orthorhombic                                                 | tetragonal                               |
| Lattice parameters (Å)                                             | <i>a</i> = 5.8443<br><i>c</i> = 14.3755          | <i>a</i> = 19.1754<br><i>b</i> = 5.4273<br><i>c</i> = 8.6423 | <i>a</i> = 19.6907<br><i>c</i> = 35.0747 |
| Cell volume (Å <sup>3</sup> )                                      | 425.23                                           | 899.40                                                       | 13599.34                                 |
| Calculated density (g/cm <sup>3</sup> )                            | 12.423                                           | 4.624                                                        | 6.209                                    |
| Data collection range                                              |                                                  | 20 to 80 °                                                   |                                          |
| No. of parameters refined                                          |                                                  | 56                                                           |                                          |
| Average apparent crystallite size (nm)                             | 26.0                                             | 18.9                                                         | 53.6                                     |
| Average apparent microstrain (×10 <sup>-4</sup> )                  | 4.23                                             | 4.23                                                         | 4.23                                     |
| Phase composition (wt %)                                           | 67.43                                            | 21.92                                                        | 10.65                                    |
| R <sub>B</sub> (%)                                                 | 4.62                                             | 14.5                                                         | 14.5                                     |
| Conventional R <sub>p</sub> , R <sub>wp</sub> , R <sub>e</sub> (%) |                                                  | 17.8, 16.0, 8.4                                              |                                          |
| GoF                                                                |                                                  | 1.9                                                          |                                          |

**Table S14.** Crystallographic data and refinement parameters obtained from the temperature-dependent X-ray powder diffraction for the BFTO (after the first step of calcination at 600 °C) collected at 900 °C.

| Chemical formula                                                   | Ba <sub>3</sub> Fe <sub>2</sub> TeO <sub>9</sub> | BaFe <sub>2</sub> O <sub>4</sub>                             | Ba <sub>3</sub> TeO <sub>6</sub>         |
|--------------------------------------------------------------------|--------------------------------------------------|--------------------------------------------------------------|------------------------------------------|
| Space group                                                        | <i>P6<sub>3</sub>/mmc</i> (194)                  | <i>Bb2<sub>1</sub>m</i> (36)                                 | <i>I4<sub>1</sub>/a</i> (88)             |
| Molecular weight                                                   | 795.27                                           | 313.02                                                       | 635.58                                   |
| Crystal system                                                     | hexagonal                                        | orthorhombic                                                 | tetragonal                               |
| Lattice parameters (Å)                                             | <i>a</i> = 5.8438<br><i>c</i> = 14.3804          | <i>a</i> = 18.9789<br><i>b</i> = 5.4376<br><i>c</i> = 8.6923 | <i>a</i> = 19.6799<br><i>c</i> = 35.0307 |
| Cell volume (Å <sup>3</sup> )                                      | 425.30                                           | 897.04                                                       | 13567.35                                 |
| Calculated density (g/cm <sup>3</sup> )                            | 12.422                                           | 4.636                                                        | 6.224                                    |
| Data collection range                                              |                                                  | 20 to 80 °                                                   |                                          |
| No. of parameters refined                                          |                                                  | 56                                                           |                                          |
| Average apparent crystallite size (nm)                             | 35.2                                             | 34.9                                                         | 80.8                                     |
| Average apparent microstrain (×10 <sup>-4</sup> )                  | 4.23                                             | 4.23                                                         | 4.23                                     |
| Phase composition (wt %)                                           | 78.92                                            | 14.46                                                        | 6.62                                     |
| R <sub>B</sub> (%)                                                 | 4.38                                             | 16.5                                                         | 15.9                                     |
| Conventional R <sub>p</sub> , R <sub>wp</sub> , R <sub>e</sub> (%) |                                                  | 15.5, 13.0, 8.1                                              |                                          |
| GoF                                                                |                                                  | 1.6                                                          |                                          |



**Table S15.** Phase composition obtained from the Rietveld refinement of PXRD data of BFTO collected from 600 °C to 900 °C after the first step of calcination (600 °C, 2 °C/min, 8 h).

| Phase (wt.%) | BaFe <sub>2</sub> O <sub>4</sub> | BaCO <sub>3</sub> | Ba <sub>3</sub> TeO <sub>6</sub> | Ba <sub>3</sub> Fe <sub>2</sub> TeO <sub>9</sub> |
|--------------|----------------------------------|-------------------|----------------------------------|--------------------------------------------------|
| Temp. (°C)   |                                  |                   |                                  |                                                  |
| 600          | 44.4(14)                         | 18.8(4)           | 3.4(1)                           | 33.4(6)                                          |
| 650          | 48.2(17)                         | 14.1(4)           | 3.9(1)                           | 33.8(7)                                          |
| 700          | 44.3(15)                         | 10.3(4)           | 6.5(2)                           | 38.9(7)                                          |
| 750          | 35.0(12)                         | 5.3(3)            | 9.8(3)                           | 49.9(8)                                          |
| 800          | 27.1(12)                         | 3.4(4)            | 10.7(2)                          | 58.8(9)                                          |
| 850          | 21.9(9)                          | -                 | 10.7(2)                          | 67.4(8)                                          |
| 900          | 14.5(6)                          | -                 | 6.6(1)                           | 78.9(7)                                          |

**Table S16.** Phase composition obtained from Rietveld refinement of PXRD data of SFTO collected from 600 °C to 900 °C after the first step of calcination (600 °C, 2 °C/min, 8 h).

| Phase (wt.%) | SrO    | SrCO <sub>3</sub> | Fe <sub>3</sub> O <sub>4</sub> | Sr <sub>3</sub> Fe <sub>2</sub> TeO <sub>9</sub> |
|--------------|--------|-------------------|--------------------------------|--------------------------------------------------|
| Temp. (°C)   |        |                   |                                |                                                  |
| 600          | 2.9(1) | 16.0(4)           | 13.5(8)                        | 67.7(8)                                          |
| 650          | 2.6(1) | 14.2(4)           | 14.0(8)                        | 69.2(8)                                          |
| 700          | 1.9(1) | 10.9(4)           | 15.7(9)                        | 71.5(8)                                          |
| 750          | -      | 3.8(4)            | 15.0(4)                        | 81.2(8)                                          |
| 800          | -      | -                 | 13.3(4)                        | 86.7(7)                                          |
| 850          | -      | -                 | 9.5(3)                         | 90.5(6)                                          |
| 900          | -      | -                 | 5.5(3)                         | 94.5(6)                                          |

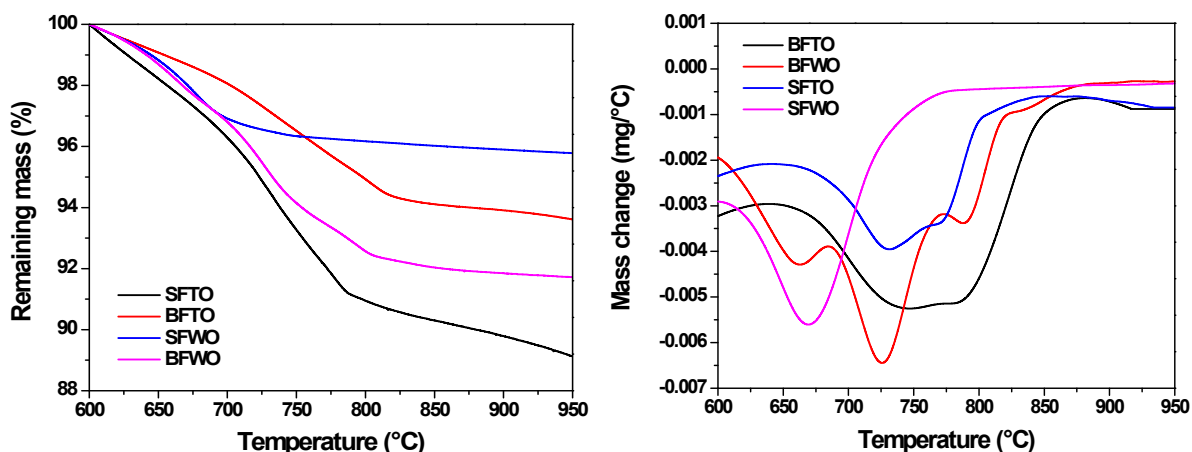

**Figure S3.** TGA (left) and DTG (right) curves of SFTO, BFTO, SFWO, and BFWO compounds recorded after the first step of calcination at 600°C.

**Table S17.** Parameters obtained from the Rietveld refinement of PXRD patterns for  $\text{Sr}_3\text{Fe}_2\text{TeO}_9$ ,  $\text{Ba}_3\text{Fe}_2\text{TeO}_9$ ,  $\text{Sr}_3\text{Fe}_2\text{WO}_9$  and  $\text{Ba}_3\text{Fe}_2\text{WO}_9$  compounds collected at room temperature and ambient pressure.

| Chemical formula                                  | $\text{Sr}_3\text{Fe}_2\text{TeO}_9$ | $\text{Ba}_3\text{Fe}_2\text{TeO}_9$ | $\text{Sr}_3\text{Fe}_2\text{WO}_9$ | $\text{Ba}_3\text{Fe}_2\text{WO}_9$ |
|---------------------------------------------------|--------------------------------------|--------------------------------------|-------------------------------------|-------------------------------------|
| Space group                                       | $I4/m$ (87)                          | $P6_3/mmc$ (194)                     | $I4/m$ (87)                         | $P6_3/mmc$ (194)                    |
| Molecular weight                                  | 646.15                               | 795.271                              | 702.38                              | 851.51                              |
| $Z$                                               | 4                                    | 2                                    | 4                                   | 2                                   |
| Crystal system                                    | tetragonal                           | hexagonal                            | tetragonal                          | hexagonal                           |
| Lattice parameters (Å)                            | $a = 5.5712(3)$<br>$c = 7.9026(3)$   | $a = 5.7691(2)$<br>$c = 14.2056(2)$  | $a = 5.5726(2)$<br>$c = 7.9038(1)$  | $a = 5.7757(2)$<br>$c = 14.1415(7)$ |
| Unit cell volume (Å <sup>3</sup> )                | 245.284(2)                           | 409.453(2)                           | 245.4412(4)                         | 408.543(2)                          |
| Calculated density (g/cm <sup>3</sup> )           | 13.255                               | 12.902                               | 6.274                               | 6.923                               |
| Data collection range                             | 10 – 100°                            |                                      |                                     |                                     |
| No. of refined parameters                         | 19                                   | 23                                   | 16                                  | 31                                  |
| Average apparent crystallite size (nm)            | 37.1                                 | 51.4                                 | 35.8                                | 31.8                                |
| Average apparent microstrain ( $\times 10^{-4}$ ) | 30.85                                | 10.56                                | 15.72                               | 4.23                                |
| $R_B$ (%)                                         | 4.67                                 | 9.38                                 | 3.58                                | 3.99                                |
| $R_p, R_{wp}, R_c$ (%)                            | 12.5, 9.72, 6.39                     | 20.7, 16.4, 9.35                     | 14.2, 15.2, 10.5                    | 16.1, 12.3, 9.66                    |
| $GoF$                                             | 1.5                                  | 1.7                                  | 1.4                                 | 1.2                                 |

**Table S18.** Structural parameters for  $\text{Sr}_3\text{Fe}_2\text{TeO}_9$  extracted at room temperature (292 K). The refined occupancies are expressed in terms of the ratio m/M: site multiplicity/multiplicity of a general position (48).

| Atom | Wyckoff position | $x$ | $y$ | $z$ | Occupancy |
|------|------------------|-----|-----|-----|-----------|
| Sr   | 4d               | 0   | 1/2 | 1/4 | 0.25000   |

|            |           |            |            |            |         |
|------------|-----------|------------|------------|------------|---------|
| <b>Fe1</b> | <i>2a</i> | 0          | 0          | 0          | 0.07125 |
| <b>Fe2</b> | <i>2b</i> | 0          | 0          | 1/2        | 0.11250 |
| <b>Te1</b> | <i>2a</i> | 0          | 0          | 0          | 0.05375 |
| <b>Te2</b> | <i>2b</i> | 0          | 0          | 1/2        | 0.01250 |
| <b>O1</b>  | <i>4e</i> | 0          | 0          | 0.24368(6) | 0.25000 |
| <b>O2</b>  | <i>8h</i> | 0.27788(9) | 0.22927(1) | 0          | 0.50000 |

**Table S19.** Structural parameters for Ba<sub>3</sub>Fe<sub>2</sub>TeO<sub>9</sub> extracted at room temperature (292 K). The refined occupancies are expressed in terms of the ratio m/M: site multiplicity/multiplicity of a general position (24).

| Atom       | Wyckoff position | <i>x</i>   | <i>y</i>   | <i>z</i>   | Occupancy |
|------------|------------------|------------|------------|------------|-----------|
| <b>Ba1</b> | <i>2b</i>        | 0          | 0          | 1/4        | 0.08333   |
| <b>Ba2</b> | <i>4f</i>        | 1/3        | 2/3        | 0.09299(1) | 0.16667   |
| <b>Fe1</b> | <i>2a</i>        | 0          | 0          | 0          | 0.08333   |
| <b>Te</b>  | <i>4f</i>        | 1/3        | 2/3        | 0.84625(1) | 0.08333   |
| <b>Fe2</b> | <i>4f</i>        | 1/3        | 2/3        | 0.84625(1) | 0.08333   |
| <b>O1</b>  | <i>6h</i>        | 0.50480(2) | 0.00960(8) | 1/4        | 0.25000   |
| <b>O2</b>  | <i>24l</i>       | 0.84200(6) | 0.68380(1) | 0.07760(4) | 0.50000   |

**Table S20.** Structural parameters for Sr<sub>3</sub>Fe<sub>2</sub>WO<sub>9</sub> extracted at room temperature (292 K). The refined occupancies are expressed in terms of the ratio m/M: site multiplicity/multiplicity of a general position (48).

| Atom       | Wyckoff position | <i>x</i> | <i>y</i> | <i>z</i> | Occupancy |
|------------|------------------|----------|----------|----------|-----------|
| <b>Sr1</b> | <i>4d</i>        | 0        | 1/2      | 1/4      | 0.25      |
| <b>Fe1</b> | <i>2a</i>        | 0        | 0        | 0        | 0.09716   |
| <b>W1</b>  | <i>2a</i>        | 0        | 0        | 0        | 0.02784   |
| <b>Fe2</b> | <i>2b</i>        | 0        | 0        | 1/2      | 0.07401   |
| <b>W2</b>  | <i>2b</i>        | 0        | 0        | 1/2      | 0.05099   |
| <b>O1</b>  | <i>8h</i>        | 0.26987  | 0.22183  | 0        | 0.5       |
| <b>O2</b>  | <i>4e</i>        | 0        | 0        | 0.24498  | 0.25      |

**Table S21.** Structural parameters for Ba<sub>3</sub>Fe<sub>2</sub>WO<sub>9</sub> extracted at room temperature (292 K). The refined occupancies are expressed in terms of the ratio m/M: site multiplicity/multiplicity of a general position (24).

| Atom       | Wyckoff position | <i>x</i> | <i>y</i> | <i>z</i> | Occupancy |
|------------|------------------|----------|----------|----------|-----------|
| <b>Ba1</b> | <i>2b</i>        | 0        | 0        | 1/4      | 0.08333   |
| <b>Ba2</b> | <i>4f</i>        | 1/3      | 2/3      | 0.094(5) | 0.16667   |
| <b>Fe1</b> | <i>4f</i>        | 1/3      | 2/3      | 0.846(5) | 0.0954    |
| <b>W1</b>  | <i>4f</i>        | 1/3      | 2/3      | 0.846(5) | 0.0713    |

|            |      |          |          |          |        |
|------------|------|----------|----------|----------|--------|
| <b>Fe2</b> | $2a$ | 0        | 0        | 0        | 0.0713 |
| <b>W2</b>  | $2a$ | 0        | 0        | 0        | 0.0121 |
| <b>O1</b>  | $6h$ | 0.482(1) | 0.019(7) | 1/4      | 0.25   |
| <b>O2</b>  | $4e$ | 0.830(4) | 0.661(8) | 0.082(2) | 0.50   |

**Table S22.** Crystallographic data and refinement parameters of byphase BaWO<sub>4</sub> obtained from the X-ray diffraction pattern of BFWO powder collected at room temperature.

| <b>Chemical formula:</b>                          | <b>BaWO<sub>4</sub></b>             |
|---------------------------------------------------|-------------------------------------|
| Space group                                       | $I4_1/a$                            |
| Molecular weight                                  | 385.17                              |
| $Z$                                               | 4                                   |
| Crystal system                                    | tetragonal                          |
| Lattice parameters (Å)                            | $a = 5.6188(2)$<br>$c = 12.7931(8)$ |
| Unit cell volume (Å <sup>3</sup> )                | 403.891(2)                          |
| Calculated density (g/cm <sup>3</sup> )           | 6.335                               |
| Average apparent crystallite size (nm)            | 36.8                                |
| Average apparent microstrain ( $\times 10^{-4}$ ) | 22.8                                |
| $R_B$ (%)                                         | 11.1                                |

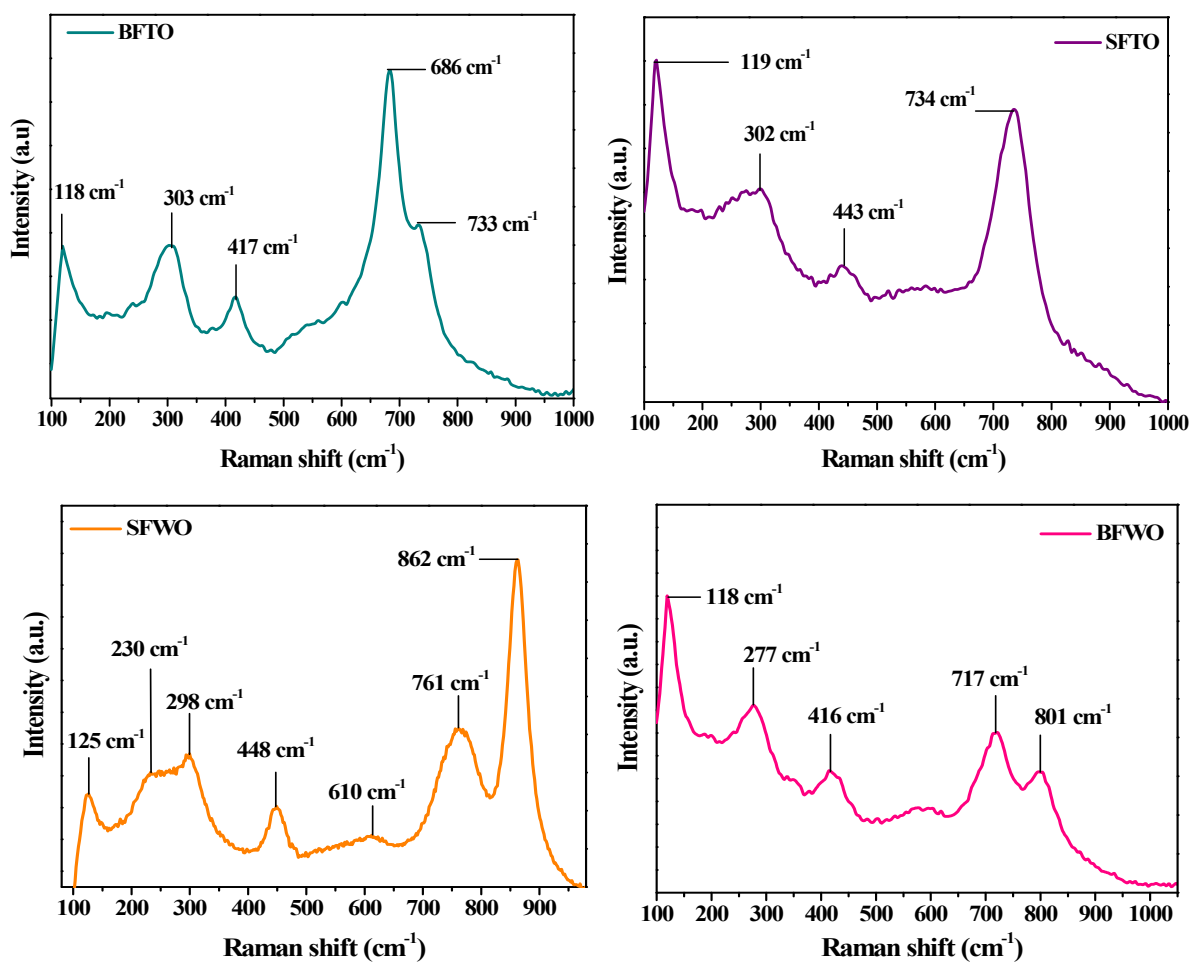

**Figure S4.** Raman spectra of synthesized compounds BFTO, SFTO, SFWO, and BFWO.

**Table S23.** Assigned Raman modes for synthesized compounds: BFTO, SFTO, SFWO and BFWO.

| Compound                                           | Raman shift (cm <sup>-1</sup> ) | Assignment      |
|----------------------------------------------------|---------------------------------|-----------------|
| <b>Ba<sub>3</sub>Fe<sub>2</sub>WO<sub>9</sub></b>  | 118                             | T-translational |
|                                                    | 277                             | L-librational   |
|                                                    | 416                             | $\nu_2$         |
|                                                    | 717                             | $\nu_1$         |
|                                                    | 801                             |                 |
| <b>Sr<sub>3</sub>Fe<sub>2</sub>WO<sub>9</sub></b>  | 125                             | T-translational |
|                                                    | 230                             | L-librational   |
|                                                    | 298                             |                 |
|                                                    | 448                             | $\nu_5$         |
|                                                    | 610                             | $\nu_2$         |
|                                                    | 761                             | $\nu_1$         |
|                                                    | 862                             |                 |
| <b>Sr<sub>3</sub>Fe<sub>2</sub>TeO<sub>9</sub></b> | 119                             | T-translational |
|                                                    | 302                             | L-librational   |
|                                                    | 443                             | $\nu_5$         |
|                                                    | 734                             | $\nu_1$         |
| <b>Ba<sub>3</sub>Fe<sub>2</sub>TeO<sub>9</sub></b> | 118                             | T-translational |
|                                                    | 303                             | L-librational   |
|                                                    | 417                             | $\nu_2$         |
|                                                    | 686                             | $\nu_1$         |
|                                                    | 733                             |                 |

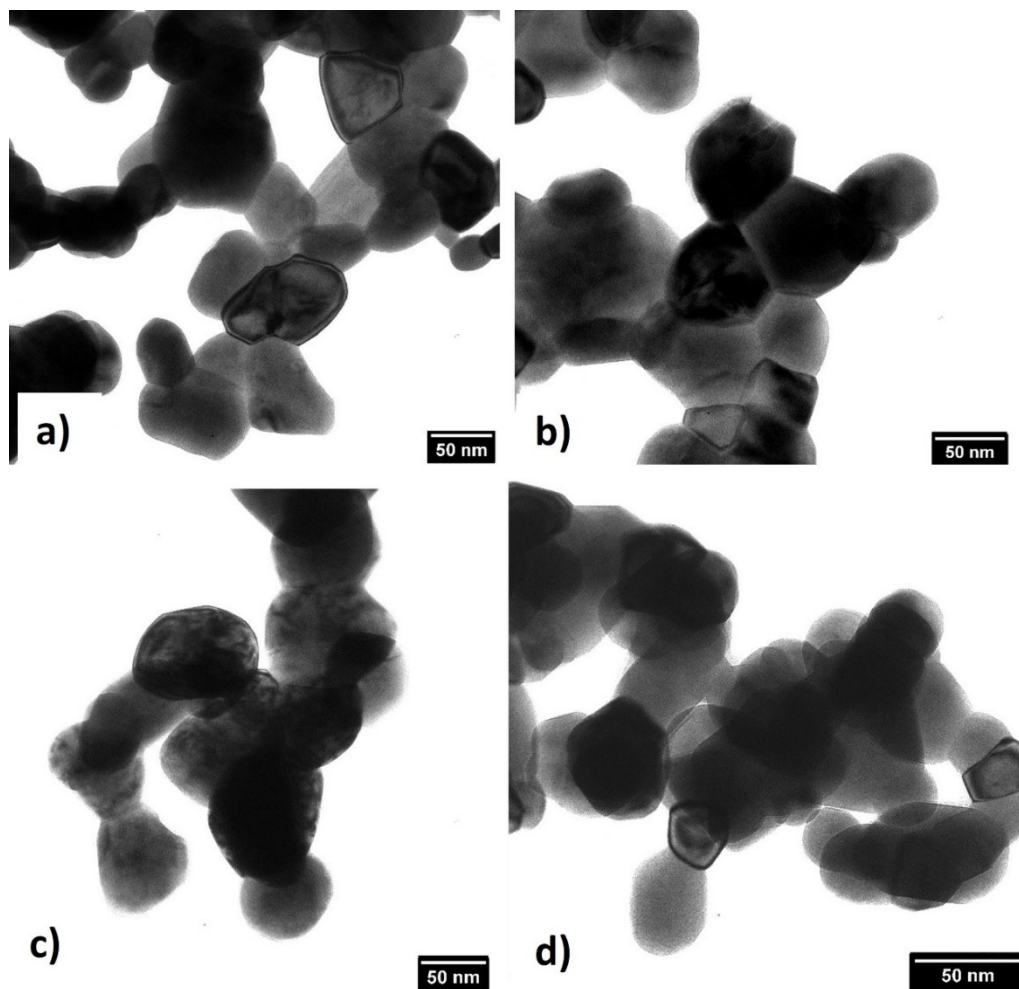

**Figure S5.** TEM images of a) BFTO, b) BFWO, c) SFTO and d) SFWO powders.

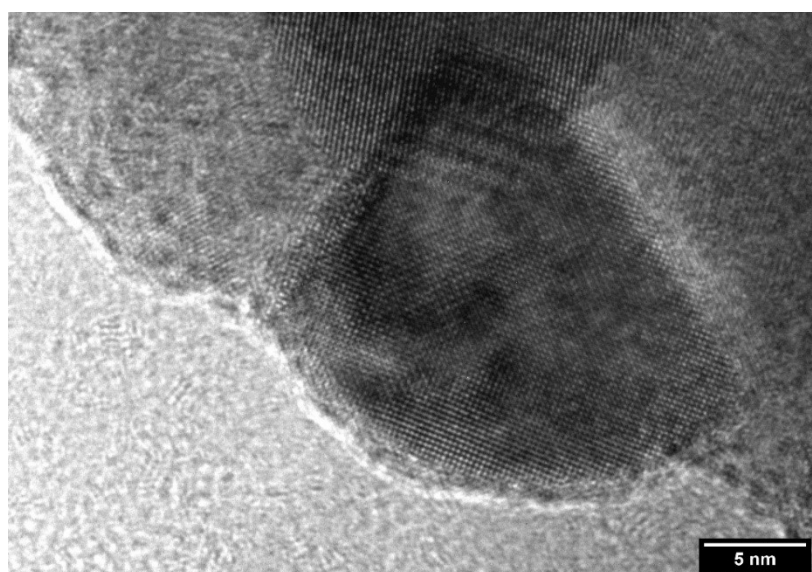

**Figure S6.** Selected HRTEM image of SFWO powder.

**Table S24.** Results of the quantitative EDX analysis of SFWO, BFWO, SFTO and BFTO pellets.

| Compound                                         | Elements | $\alpha$ series | Energy (eV) | Atomic percent (at. %) | Nominal chemical composition (at. %) |
|--------------------------------------------------|----------|-----------------|-------------|------------------------|--------------------------------------|
| Sr <sub>3</sub> Fe <sub>2</sub> WO <sub>9</sub>  | Sr       | K               | 14.1        | 22.3                   | 20                                   |
|                                                  | Fe       | K               | 6.4         | 15.0                   | 13.3                                 |
|                                                  | W        | L               | 8.4         | 7.1                    | 6.7                                  |
|                                                  | O        | K               | 0.5         | 55.6                   | 60                                   |
| Ba <sub>3</sub> Fe <sub>2</sub> WO <sub>9</sub>  | Ba       | L               | 4.5         | 22.8                   | 20                                   |
|                                                  | Fe       | K               | 6.4         | 14.5                   | 13.3                                 |
|                                                  | W        | L               | 8.4         | 7.2                    | 6.7                                  |
|                                                  | O        | K               | 0.5         | 55.6                   | 60                                   |
| Sr <sub>3</sub> Fe <sub>2</sub> TeO <sub>9</sub> | Sr       | K               | 14.1        | 21.8                   | 20                                   |
|                                                  | Fe       | K               | 6.4         | 14.9                   | 13.3                                 |
|                                                  | Te       | L               | 3.8         | 6.8                    | 6.7                                  |
|                                                  | O        | K               | 0.5         | 56.5                   | 60                                   |
| Ba <sub>3</sub> Fe <sub>2</sub> TeO <sub>9</sub> | Ba       | L               | 4.5         | 23.5                   | 20                                   |
|                                                  | Fe       | K               | 6.4         | 14.7                   | 13.3                                 |
|                                                  | Te       | L               | 3.8         | 7.2                    | 6.7                                  |
|                                                  | O        | K               | 0.5         | 54.7                   | 60                                   |

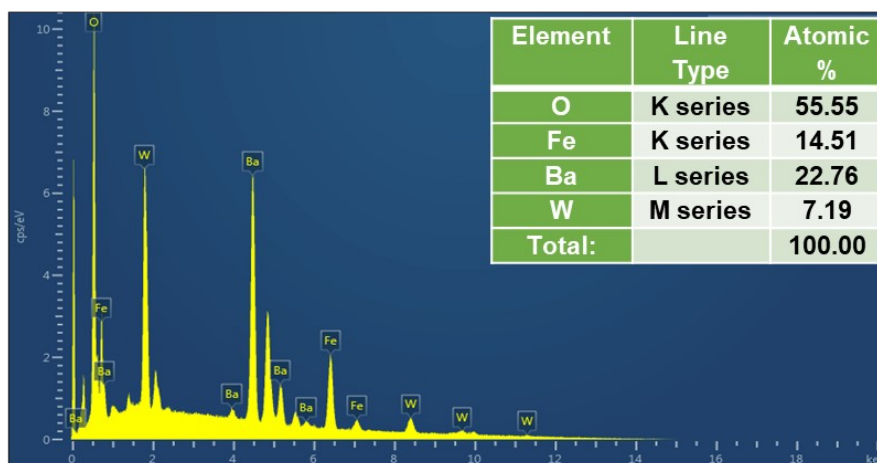

**Figure S7.** EDX spectrum of BFWO pellet.



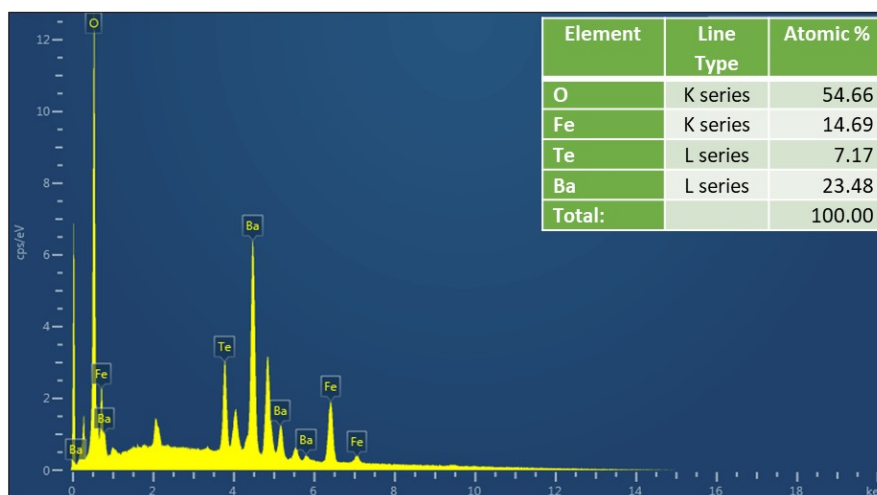

**Figure S8.** EDX spectrum of BFTO pellet.

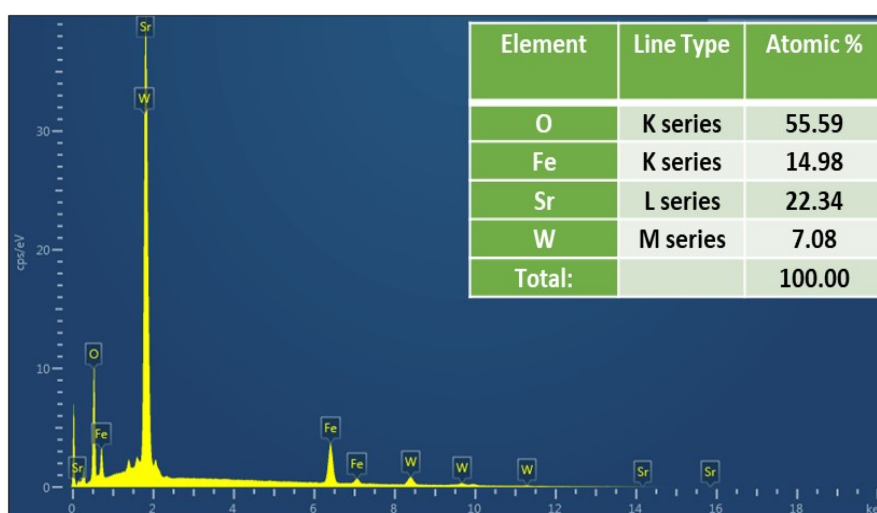

**Figure S9.** EDX spectrum of SFWO pellet.

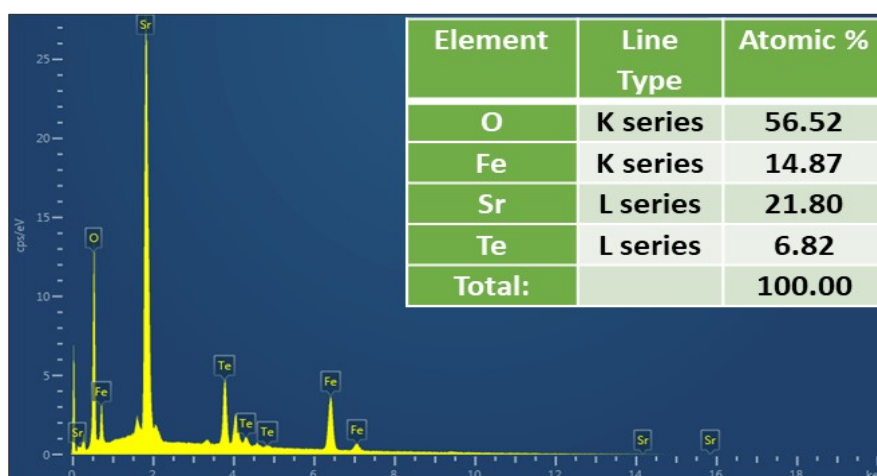

**Figure S10.** EDX spectrum of SFTO pellet.

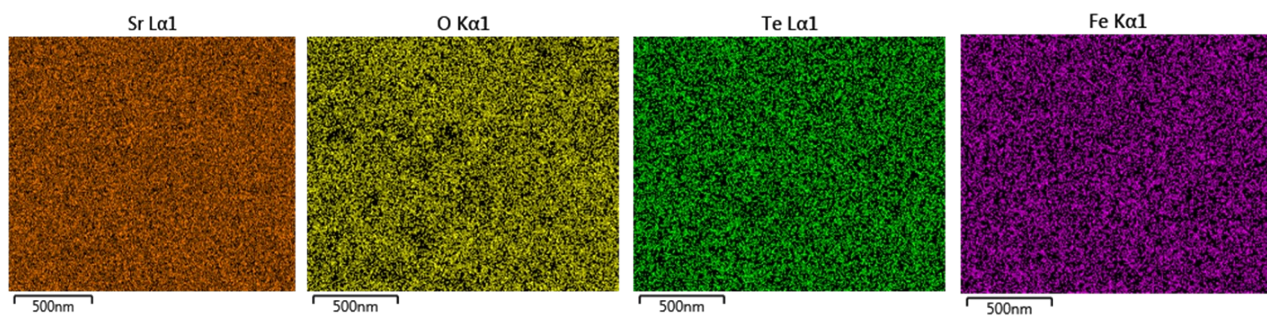

**Figure S11.** Qualitative elemental maps of SFTO pellet.

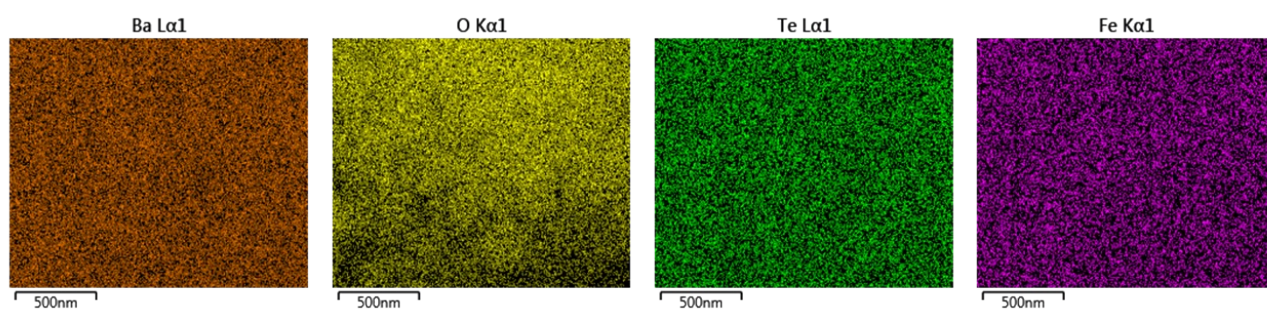

**Figure S12.** Qualitative elemental maps of BFTO pellet.

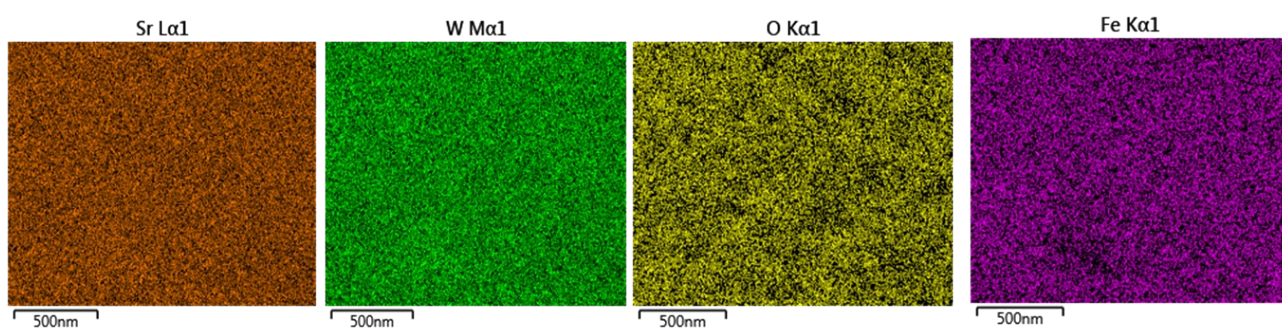

**Figure S13.** Qualitative elemental maps of SFWO pellet.

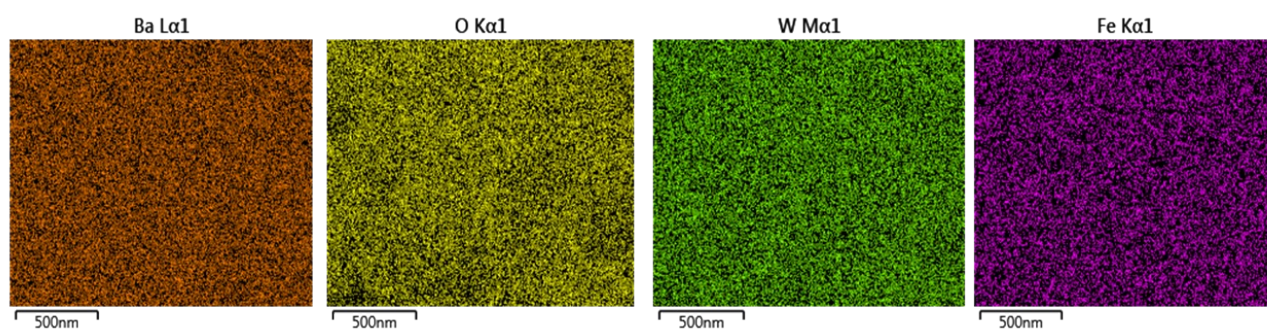

**Figure S14.** Qualitative elemental maps of BFWO pellet.

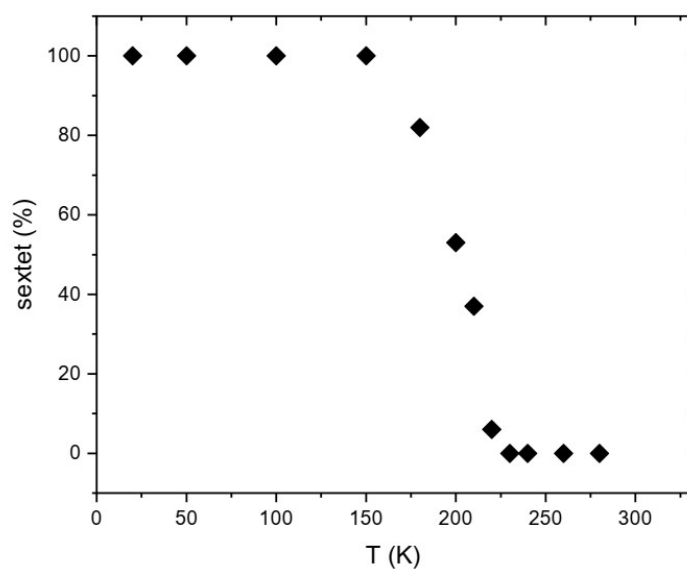

**Figure S15.** Temperature dependence of the magnetic contributions (sextets) in Mössbauer spectra of BFWO.

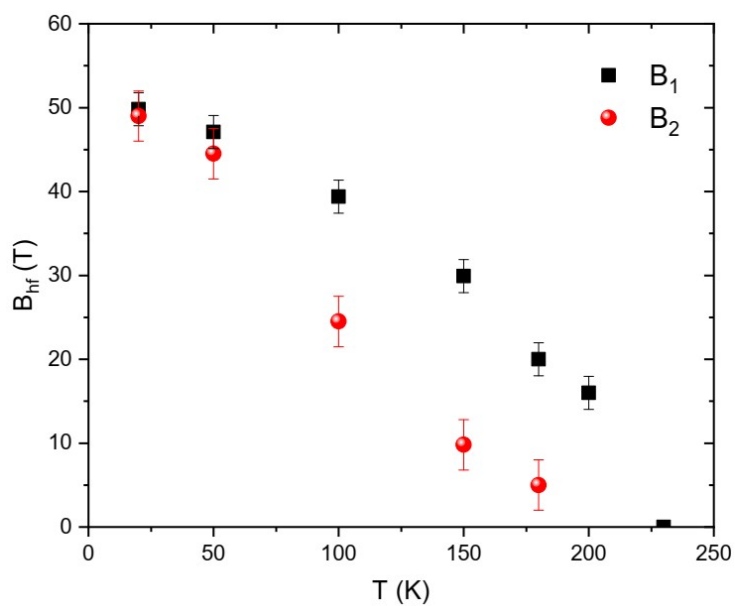

**Figure S16.** Temperature dependence of the mean magnetic hyperfine fields  $B_1$  and  $B_2$  of the two magnetic patterns in BFWO.



**Table S25.** The essential characteristics of Mössbauer spectra of synthesized compounds.

| Sample  | $T$ (K) | Type of spectrum | Relative area (%) | Center shift (mm/s) | Quadrupole splitting (mm/s) | Mean magnetic hyperfine field $B_{\text{hf}}$ (T) | Gaussian width of $B_{\text{hf}}$ (T) | Lorentzian width (mm/s) |
|---------|---------|------------------|-------------------|---------------------|-----------------------------|---------------------------------------------------|---------------------------------------|-------------------------|
| BFWO    | 20      | sextet           | 60(2)             | 0.48(1)             | 0.20(2)                     | 49.8(1)                                           | 1.3(1)                                | 0.54(5)                 |
|         | 20      | sextet           | 40(29)            | 0.48(1)             | 0.00(2)                     | 49.0(1)                                           | 1.7(1)                                | 0.54(5)                 |
|         |         |                  |                   |                     |                             |                                                   |                                       |                         |
|         | 300     | doublet          | 78(2)             | 0.37(1)             | 0.61(1)                     |                                                   |                                       | 0.42(2)                 |
|         |         | doublet          | 22(2)             | 0.40(1)             | 1.06(1)                     |                                                   |                                       | 0.42(2)                 |
|         |         |                  |                   |                     |                             |                                                   |                                       |                         |
| SFWO    | 20      | sextet           | 50(2)             | 0.40(2)             | 0.21(1)                     | 51.4(1)                                           | 2.5(1)                                | 0.25(5)                 |
|         |         | sextet           | 44(2)             | 0.53(2)             | -0.22(1)                    | 52.0(1)                                           | 2.0(1)                                | 0.25(5)                 |
|         |         | sextet           | 6(2)              | 0.33(2)             | 0.19(2)                     | 25.5(1)                                           | 1.6(1)                                | 0.25(5)                 |
|         |         |                  |                   |                     |                             |                                                   |                                       |                         |
|         | 300     | sextet           | 63(2)             | 0.35(1)             | -0.02(2)                    | 31.6(1)                                           | 4.4(2)                                | 0.66(5)                 |
|         |         | sextet           | 37(2)             | 0.36(1)             | 0.18(2)                     | 14.4(2)                                           | 10(1)                                 | 0.46(5)                 |
|         |         |                  |                   |                     |                             |                                                   |                                       |                         |
| BFTO    | 20      | sextet           | 42(2)             | 0.47(1)             | 0.53(2)                     | 51.4(2)                                           | 1.5(1)                                | 0.27(3)                 |
|         |         | sextet           | 33(2)             | 0.46(1)             | 0.25(2)                     | 46.4(2)                                           | 3.5(1)                                | 0.43(5)                 |
|         |         | sextet           | 13(2)             | 0.47(1)             | 0.26(2)                     | 19.0(2)                                           | 10(1)                                 | 0.27(5)                 |
|         |         | sextet           | 12(2)             | 0.48(1)             | -0.12(2)                    | 50.1(2)                                           | 0.0(2)                                | 0.43(2)                 |
|         |         |                  |                   |                     |                             |                                                   |                                       |                         |
|         | 300     | sextet           | 43(4)             | 0.36(2)             | 0.9(1)                      | 22(1)                                             | 10(1)                                 | 0.40(5)                 |
|         |         | doublet          | 30(4)             | 0.36(2)             | 0.52(2)                     |                                                   |                                       | 0.40(2)                 |
| doublet |         | 26(4)            | 0.37(2)           | 1.17(2)             |                             |                                                   | 0.40(2)                               |                         |
|         |         |                  |                   |                     |                             |                                                   |                                       |                         |
| SFTO    | 20      | sextet           | 46(2)             | 0.48(1)             | 0.01(2)                     | 49.1(2)                                           | 2.6(1)                                | 0.50(2)                 |
|         |         | sextet           | 42(2)             | 0.48(1)             | 0.02(2)                     | 52.5(2)                                           | 1.2(1)                                | 0.50(2)                 |
|         |         | sextet           | 12(2)             | 0.48(1)             | 0.09(2)                     | 23.1(2)                                           | 4.3(2)                                | 0.50(2)                 |
|         |         |                  |                   |                     |                             |                                                   |                                       |                         |
|         | 300     | sextet           | 11(4)             | 0.35(2)             | 0.27(2)                     | 42.0(2)                                           | 2.0(1)                                | 0.47(5)                 |
|         |         | doublet          | 48(4)             | 0.23(1)             | 0.51(1)                     |                                                   |                                       | 0.62(4)                 |
| doublet |         | 41(4)            | 0.38              | 1.14(1)             |                             |                                                   | 0.52(3)                               |                         |

**Table S26.** Optical band gap values for  $\text{Sr}_3\text{Fe}_2\text{WO}_9$ ,  $\text{Sr}_3\text{Fe}_2\text{TeO}_9$ ,  $\text{Ba}_3\text{Fe}_2\text{WO}_9$  and  $\text{Ba}_3\text{Fe}_2\text{TeO}_9$ .

| Compound                             | Indirect bandgap (eV) | Direct band gap (eV) |
|--------------------------------------|-----------------------|----------------------|
| $\text{Sr}_3\text{Fe}_2\text{TeO}_9$ | 1.97                  | 2.45                 |
| $\text{Ba}_3\text{Fe}_2\text{TeO}_9$ | 2.02                  | 2.74                 |
| $\text{Sr}_3\text{Fe}_2\text{WO}_9$  | 1.88                  | 2.53                 |
| $\text{Ba}_3\text{Fe}_2\text{WO}_9$  | 1.61                  | 2.36                 |

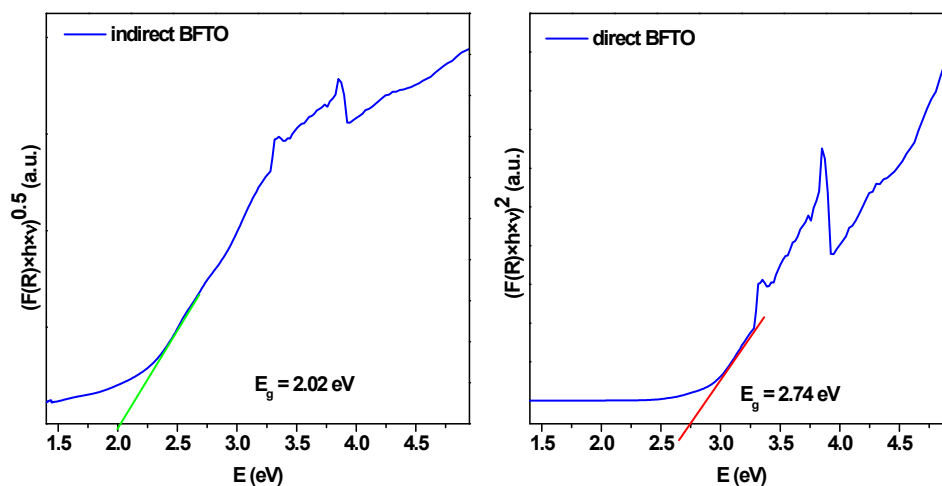

**Figure S17.** Tauc plot for direct and indirect band gap estimation of BFTO powder.

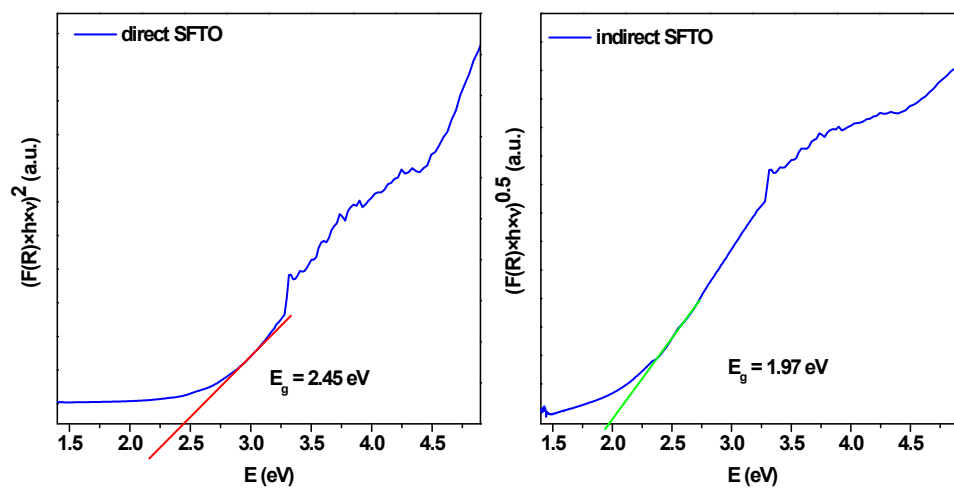

**Figure S18.** Tauc plot for direct and indirect band gap estimation of SFTO powder.

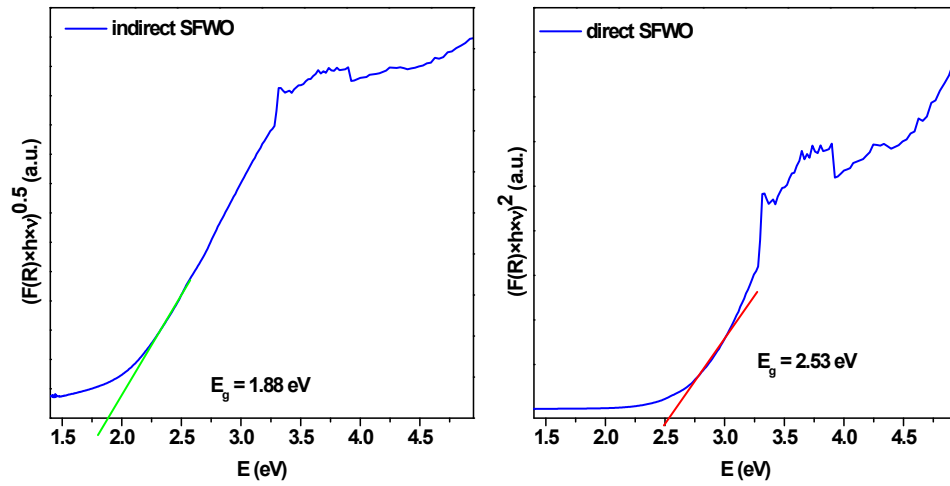

**Figure S19.** Tauc plot for direct and indirect band gap estimation of SFWO powder.

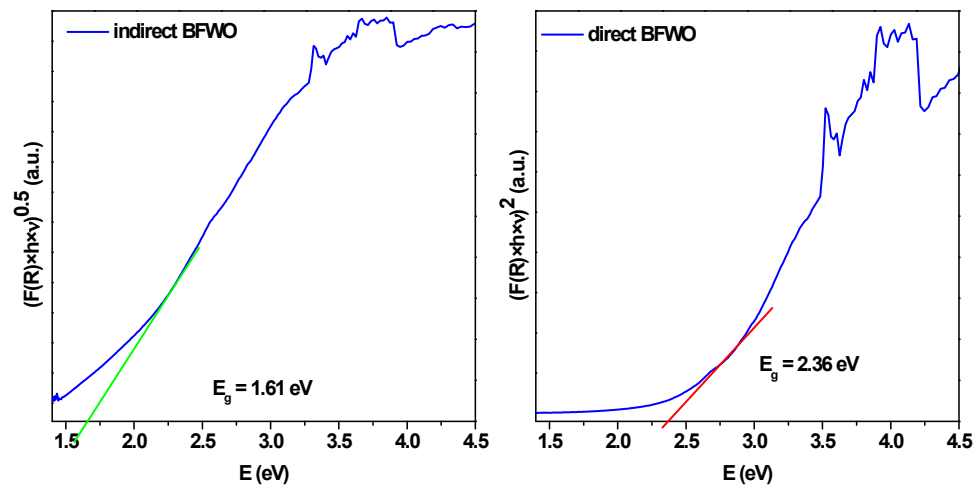

**Figure S20.** Tauc plot for direct and indirect band gap estimation of BFWO powder.

**Table S27.** Parameters obtained from the Rietveld refinement of XRD patterns for Sr<sub>3</sub>Fe<sub>2</sub>TeO<sub>9</sub>, Ba<sub>3</sub>Fe<sub>2</sub>TeO<sub>9</sub>, Sr<sub>3</sub>Fe<sub>2</sub>WO<sub>9</sub> and Ba<sub>3</sub>Fe<sub>2</sub>WO<sub>9</sub> pellets collected at room temperature and ambient pressure.

| <b>Chemical formula:</b>                                                | <b>Sr<sub>3</sub>Fe<sub>2</sub>TeO<sub>9</sub></b> | <b>Ba<sub>3</sub>Fe<sub>2</sub>TeO<sub>9</sub></b> | <b>Sr<sub>3</sub>Fe<sub>2</sub>WO<sub>9</sub></b> | <b>Ba<sub>3</sub>Fe<sub>2</sub>WO<sub>9</sub></b> |
|-------------------------------------------------------------------------|----------------------------------------------------|----------------------------------------------------|---------------------------------------------------|---------------------------------------------------|
| Space group                                                             | <i>I4/m</i> (87)                                   | <i>P6<sub>3</sub>/mmc</i> (194)                    | <i>I4/m</i> (87)                                  | <i>P6<sub>3</sub>/mmc</i> (194)                   |
| Molecular weight                                                        | 646.15                                             | 795.271                                            | 702.38                                            | 851.51                                            |
| <i>Z</i>                                                                | 4                                                  | 2                                                  | 4                                                 | 2                                                 |
| Crystal system                                                          | tetragonal                                         | hexagonal                                          | tetragonal                                        | hexagonal                                         |
| Lattice parameters (Å)                                                  | <i>a</i> = 5.5770(2)<br><i>c</i> = 7.8870(1)       | <i>a</i> = 5.7682(2)<br><i>c</i> = 14.2097(7)      | <i>a</i> = 5.5648(2)<br><i>c</i> = 7.8685(1)      | <i>a</i> = 5.7471(2)<br><i>c</i> = 14.0842(7)     |
| Unit cell volume (Å <sup>3</sup> )                                      | 245.3064(4)                                        | 409.4449(2)                                        | 243.6624(4)                                       | 402.873(2)                                        |
| Calculated density (g/cm <sup>3</sup> )                                 | 13.254                                             | 12.902                                             | 6.383                                             | 7.020                                             |
| Data collection range                                                   | 10 – 80°                                           |                                                    |                                                   |                                                   |
| No. of refined parameters                                               | 17                                                 | 21                                                 | 18                                                | 21                                                |
| Average apparent crystallite size (nm)                                  | 45.2                                               | 53.6                                               | 40.2                                              | 44.0                                              |
| Average apparent microstrain (×10 <sup>-4</sup> )                       | 22.42                                              | 16.81                                              | 22.61                                             | 21.72                                             |
| <i>R<sub>B</sub></i> (%)                                                | 4.78                                               | 7.79                                               | 3.46                                              | 8.04                                              |
| <i>R<sub>p</sub></i> , <i>R<sub>wp</sub></i> , <i>R<sub>c</sub></i> (%) | 25.0, 18.4, 9.7                                    | 21.8, 16.8, 13.1                                   | 25.6, 18.8, 9.12                                  | 26.2, 23.3, 11.8                                  |
| <i>GoF</i>                                                              | 1.9                                                | 1.3                                                | 2.1                                               | 2.0                                               |

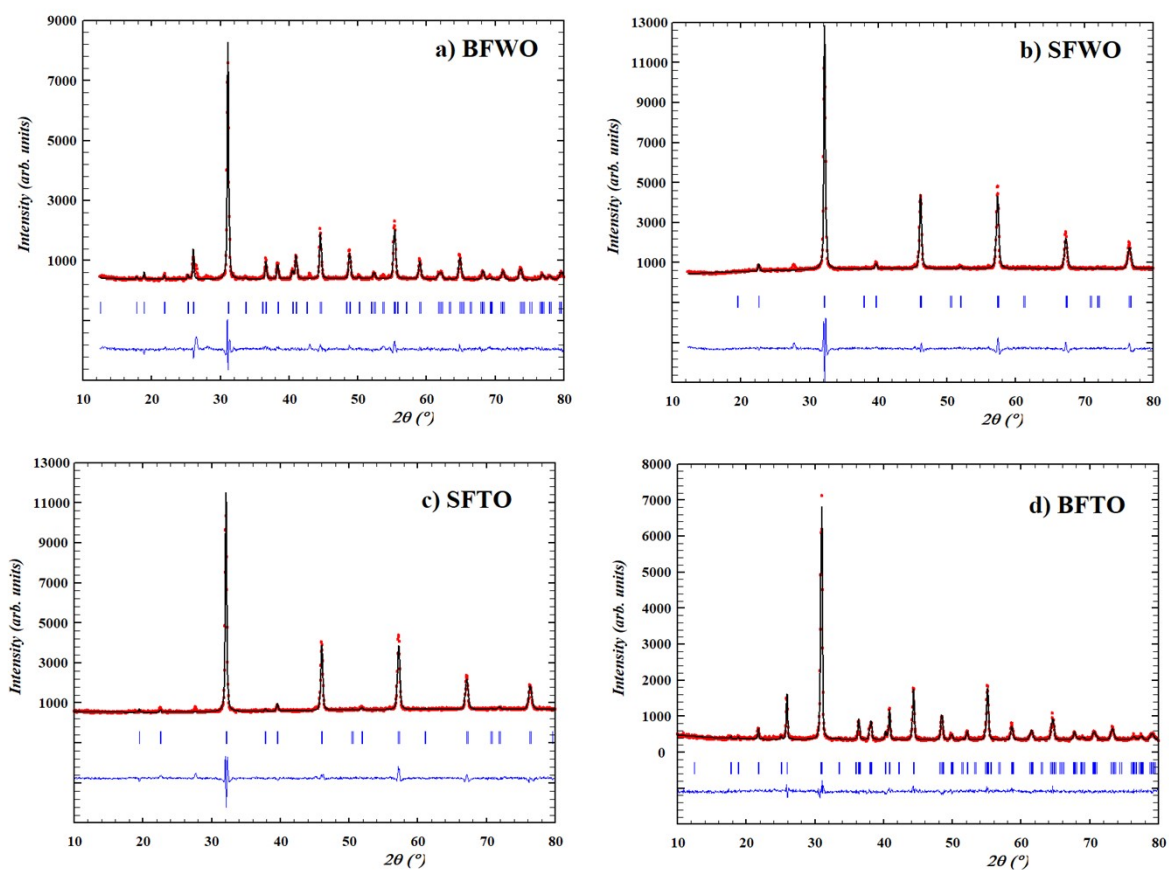

**Figure S21.** Rietveld plots of refined X-ray diffraction patterns of BFWO (a), SFWO (b), SFTO (c) and BFTO (d) pellets collected at room temperature and ambient pressure: experimental (red), calculated (black), difference (blue).
